# Supplementary material for: Mitochondrial DNA Suggests the Introduction of Honeybees of African Ancestry to East-Central Europe
Source: MDPI journal article supplement (doi:10.3390/insects12050410), 2021-05-02
Supplement: s1 [file s1]

**Table S1.** Honeybee mitotypes found in East-Central Europe.

| Mitotype | Lineage | Sequence type | Number of samples | Estimated proportion (95% confidence intervals) | Accession number | Names of the most similar mitotypes present in the GenBank – accession number (% similarity)                                                 |
|----------|---------|---------------|-------------------|-------------------------------------------------|------------------|----------------------------------------------------------------------------------------------------------------------------------------------|
| C2d      | C       | Q             | 75                | 0.176 (0.141, 0.215)                            | MW939577         | C2d - MF136776 (100)<br>C2d - JF723977 (100)<br>C12 - FJ037777 (100)                                                                         |
| C2i      | C       | Q             | 2                 | 0.005 (0.001, 0.017)                            | MW939606         | C2i - JQ977703 (100)<br>C19 - FJ037782 (100)                                                                                                 |
| C2aa     | C       | Q             | 2                 | 0.005 (0.001, 0.017)                            | MW939619         | C2aa - MG788257 (100)                                                                                                                        |
| C2j      | C       | Q             | 39                | 0.091 (0.066, 0.123)                            | MW939580         | C2j - JF723978 (100)<br>C11 - FJ037776 (100)                                                                                                 |
| C2ja     | C       | Q             | 3                 | 0.007 (0.001, 0.02)                             | MW939587         | C2i - JQ977703 (99.82)<br>C2j - JF723978 (99.82)                                                                                             |
| C2jb     | C       | Q             | 1                 | 0.002 (0, 0.013)                                | MW939592         | <i>A. m. caucasica</i> mitochondrion, complete genome, unnamed mitotype - MN714160 (100)<br>C2j - MH939345 (99.82)<br>C11 - FJ037776 (99.82) |
| C2s      | C       | Q             | 3                 | 0.007 (0.001, 0.02)                             | MW939585         | C2s - JF723979 (100)<br>C31 - HQ287900 (100)                                                                                                 |
| C2c      | C       | Q             | 133               | 0.309 (0.268, 0.358)                            | MW939584         | C2c - JF723976 (100)<br>C2c - HQ199227 (100)                                                                                                 |
| C2cc     | C       | Q             | 1                 | 0.002 (0, 0.013)                                | MW939600         | C2v1 MH939336 (99.82)<br>C2c - JF723976 (99.82)<br>C2c - HQ199227 (99.82)                                                                    |
| C2ca     | C       | Q             | 1                 | 0.002 (0, 0.013)                                | MW939618         | C2c - JF723976 (99.82)<br>C2c - HQ199227 (99.82)                                                                                             |
| C2ac     | C       | Q             | 11                | 0.026 (0.013, 0.046)                            | MW939620         | C2ac - MT741501 (100)                                                                                                                        |
| C2ah     | C       | Q             | 3                 | 0.007 (0.001, 0.02)                             | MW939617         | C2ah - MT741506 (100)                                                                                                                        |
| C2w      | C       | Q             | 5                 | 0.012 (0.004, 0.027)                            | MW939578         | C2w - MT741499 (100)                                                                                                                         |
| C2jc     | C       | Q             | 1                 | 0.002 (0, 0.013)                                | MW939589         | C2j - MH939345 (99.82)<br>C2e - JQ977702 (99.82)<br>C11 - FJ037776 (99.82)                                                                   |
| C2e      | C       | Q             | 41                | 0.096 (0.07, 0.128)                             | MW939590         | C2e - JQ977702 (100)                                                                                                                         |
| C2ea     | C       | Q             | 1                 | 0.002 (0, 0.013)                                | MW939607         | C2e - JQ977702 (99.82)                                                                                                                       |
| C2da     | C       | Q             | 4                 | 0.009 (0.003, 0.024)                            | MW939579         | C2d - JF723977 (99.30)                                                                                                                       |

| Mitotype    | Lineage | Sequence type     | Number of samples | Estimated proportion (95% confidence intervals) | Accession number | Names of the most similar mitotypes present in the GenBank – accession number (% similarity)                                                                                                            |
|-------------|---------|-------------------|-------------------|-------------------------------------------------|------------------|---------------------------------------------------------------------------------------------------------------------------------------------------------------------------------------------------------|
|             |         |                   |                   |                                                 |                  | C27 - HQ287899 (99.30)<br>C12 - FJ037777 (99.30)                                                                                                                                                        |
| <b>C1a</b>  | C       | Q                 | 38                | 0.089 (0.064, 0.12)                             | MW939583         | C1a - JQ977699 (100)<br>C1 - MF136775 (100)                                                                                                                                                             |
| <b>C2cd</b> | C       | Q                 | 12                | 0.028 (0.015, 0.049)                            | MW939593         | <i>A. m. carpathica</i> “Sklenar 47#4”, unnamed mitotype - MK140902 (100)<br><i>A. m. carpathica</i> “Hoverla”, unnamed mitotype – MK140896 (99.82)<br>C2c - JF723976 (99.82)<br>C1a - JQ977699 (99.82) |
| <b>A1e</b>  | A       | P <sub>0</sub> Q  | 2                 | 0.005 (0.001, 0.017)                            | MW939582         | A1e - GU326335 (100)<br><i>A. m. capensis</i> , unnamed haplotype - MG552696 (100)<br><i>A. m. scutellata</i> , unnamed haplotype - KY614238                                                            |
| <b>A4s</b>  | A       | P <sub>0</sub> QQ | 2                 | 0.005 (0.001, 0.017)                            | MW939597         | A4, Africanised honeybee from Brazil - EF033650 (99.88)<br>A4-BEN4, <i>A. m. adansonii</i> from Benin - MG592303 (99.76)<br>A26d, Africanised honeybee from USA - GU326336 (99.76)                      |
| <b>A4</b>   | A       | P <sub>0</sub> QQ | 3                 | 0.007 (0.001, 0.02)                             | MW939614         | A4 - EF033650 (100)                                                                                                                                                                                     |
| <b>M4r</b>  | M       | PQQ               | 9                 | 0.021 (0.01, 0.04)                              | MW939581         | <i>A. m. sinisxinyuan</i> , unnamed mitotype - MN733955 (99.76)<br>M4 - EF033656 (99.76)<br>M4q - MK387716 (99.76)                                                                                      |
| <b>M4t</b>  | M       | PQQ               | 6                 | 0.014 (0.005, 0.03)                             | MW939586         | M4 - EF033656 (99.88)                                                                                                                                                                                   |
| <b>M4ta</b> | M       | PQQ               | 1                 | 0.002 (0, 0.013)                                | MW939611         | M4 - EF033656 (99.76)                                                                                                                                                                                   |
| <b>M4pa</b> | M       | PQQ               | 1                 | 0.002 (0, 0.013)                                | MW939604         | M4p - KX463897 (99.64)<br>M4m - KX463894 (99.64)<br>M17i - KX463898 (99.64)                                                                                                                             |
| <b>M4na</b> | M       | PQQ               | 2                 | 0.005 (0.001, 0.017)                            | MW939588         | M4n - KX463895 (99.76)<br><i>A. m. sinisxinyuan</i> , unnamed mitotype - MN733955 (99.76)                                                                                                               |
| <b>M4s</b>  | M       | PQQ               | 8                 | 0.019 (0.008, 0.037)                            | MW939595         | <i>A. m. sinisxinyuan</i> , unnamed mitotype - MN733955 (99.88)<br>M4n - KX463895 (99.64)<br>M4q - MK387716 (99.64)                                                                                     |
| <b>M4sa</b> | M       | PQQ               | 1                 | 0.002 (0, 0.013)                                | MW939596         | <i>A. m. sinisxinyuan</i> , unnamed mitotype - MN733955 (99.76)<br>M4n - KX463895 (99.52)                                                                                                               |

| Mitotype     | Lineage | Sequence type | Number of samples | Estimated proportion (95% confidence intervals) | Accession number | Names of the most similar mitotypes present in the GenBank – accession number (% similarity)                                                 |
|--------------|---------|---------------|-------------------|-------------------------------------------------|------------------|----------------------------------------------------------------------------------------------------------------------------------------------|
|              |         |               |                   |                                                 |                  | M4q - MK387716 (99.52)                                                                                                                       |
| <b>M4sb</b>  | M       | PQQ           | 1                 | 0.002 (0, 0.013)                                | MW939598         | <i>A. m. sinisxinyuan</i> , unnamed mitotype - MN733955 (99.76)<br>M4q - MK387716 (99.52)<br>M4n - KX463895 (99.52)<br>M4 - EF033656 (99.52) |
| <b>M4ra</b>  | M       | PQQ           | 1                 | 0.002 (0, 0.013)                                | MW939603         | M4q - MK387716 (99.76)<br><i>A. m. sinisxinyuan</i> , unnamed mitotype - MN733955 (99.64)                                                    |
| <b>M4tb</b>  | M       | PQQ           | 1                 | 0.002 (0, 0.013)                                | MW939605         | M77' - KX463940.1 (99.45)                                                                                                                    |
| <b>M4rc</b>  | M       | PQQ           | 1                 | 0.002 (0, 0.013)                                | MW939610         | <i>A. m. sinisxinyuan</i> , unnamed mitotype - MN733955 (99.52)<br>M4q - MK387716 (99.52)                                                    |
| <b>M4rb</b>  | M       | PQQ           | 1                 | 0.002 (0, 0.013)                                | MW939612         | <i>A. m. sinisxinyuan</i> , unnamed mitotype - MN733955 (99.88)<br>M4q - MK387716 (99.64)                                                    |
| <b>M4ra'</b> | M       | PQQQ          | 1                 | 0.002 (0, 0.013)                                | MW939615         | M77' - KX463940 (98.83)<br>M4f' - KX463934 (98.83)<br>M4e' - KX463933 (98.83)                                                                |
| <b>M4sa'</b> | M       | PQQQ          | 1                 | 0.002 (0, 0.013)                                | MW939591         | M77' - KX463940 (99.41)<br>M4f' - KX463934 (99.41)<br>M4e' - KX463933 (99.41)                                                                |
| <b>M4ea'</b> | M       | PQQQ          | 1                 | 0.002 (0, 0.013)                                | MW939601         | M77' - KX463940 (99.32)<br>M4f' - KX463934 (99.32)<br>M4e' - KX463933 (99.32)                                                                |
| <b>M4sb'</b> | M       | PQQQ          | 2                 | 0.005 (0.001, 0.017)                            | MW939602         | M77' - KX463940 (99.41)<br>M4f' - KX463934 (99.41)<br>M4e' - KX463933 (99.41)                                                                |
| <b>M4fa'</b> | M       | PQQQ          | 1                 | 0.002 (0, 0.013)                                | MW939594         | M77' - KX463940 (99.71)<br>M4f' - KX463934 (99.71)<br>M4e' - KX463933 (99.71)                                                                |
| <b>M4sf</b>  | M       | PQQ           | 1                 | 0.002 (0, 0.013)                                | MW939609         | <i>A. m. sinisxinyuan</i> , unnamed mitotype - MN733955 (99.76)<br>M4q - MK387716 (99.52)<br>M4n - KX463895 (99.52)<br>M5 - FJ743638 (99.52) |
| <b>M4sc</b>  | M       | PQQ           | 1                 | 0.002 (0, 0.013)                                | MW939608         | <i>A. m. sinisxinyuan</i> , unnamed mitotype - MN733955 (99.76)<br>M4q - MK387716 (99.52)<br>M4n - KX463895 (99.52)                          |

| Mitotype     | Lineage | Sequence type | Number of samples | Estimated proportion (95% confidence intervals) | Accession number | Names of the most similar mitotypes present in the GenBank – accession number (% similarity)                       |
|--------------|---------|---------------|-------------------|-------------------------------------------------|------------------|--------------------------------------------------------------------------------------------------------------------|
| <b>M4qa</b>  | M       | PQQ           | 1                 | 0.002 (0, 0.013)                                | MW939616         | M4 - EF033656 (99.64)<br><i>A. m. sinisxinyuan</i> , unnamed mitotype - EF033656 (99.64)<br>M4q - MK387716 (99.39) |
| <b>M4rb'</b> | M       | PQQQ          | 1                 | 0.002 (0, 0.013)                                | MW939613         | M77' - KX463940 (99.41)<br>M4f' - KX463934 (99.41)<br>M4e' - KX463933 (99.41)                                      |
| <b>M30a</b>  | M       | PQ            | 1                 | 0.002 (0, 0.013)                                | MW939599         | <i>A. m.</i> unnamed mitotype -KT164631 (99.68)<br>(draI restriction pattern similar to mitotype M30, HQ260340)    |
